# Supplementary material for: Deep-ultraviolet-light-driven reversible doping of WS2 field-effect transistors
Source: Royal Society of Chemistry journal article supplement (doi:10.1039/c4nr05129g), 2014-11-19
Supplement: c4nr05129g1.pdf [file c4nr05129g1.pdf]

## Supporting Information

### **Deep-Ultraviolet-Light-Driven Reversible Doping of WS<sub>2</sub> Field-Effect Transistor**

Muhammad Waqas Iqbal<sup>1</sup>, Muhammad Zahir Iqbal<sup>1</sup>, Muhammad Farooq Khan<sup>1</sup>, Muhammad Arslan Shehzad<sup>2</sup>, Yongho Seo<sup>2</sup>, Jonghwa Eom<sup>1\*</sup>

<sup>1</sup>Department of Physics and Graphene Research Institute, Sejong University, Seoul 143-747, Korea.

<sup>2</sup>Faculty of Nanotechnology & Advanced Materials Engineering and Graphene Research Institute, Sejong University, Seoul 143-747, Korea.

E-mail: eom@sejong.ac.kr

We have measured the electronic transport properties of SL, BL and ML-WS<sub>2</sub> field effect transistor by sweeping the back gate voltage before and after DUV+N<sub>2</sub> treatment. Figures S1a, c and e show typical hysteresis curves observed in SL, BL and ML-WS<sub>2</sub> devices on SiO<sub>2</sub> substrate before exposing the devices to DUV+N<sub>2</sub> treatment, where the back gate voltage was swept continuously from -30 to +40 V and then from +40 V to -30 V. We note that threshold voltage ( $V_{th}$ ) moves towards negative (positive) back gate voltage ( $V_{bg}$ ) for the gate voltage sweep from -30 V (+40 V) to +40 V (-30 V). The hysteresis in threshold voltage ( $V_{th}$ ) was around 6 - 8 V for SL, BL and ML-WS<sub>2</sub> devices on SiO<sub>2</sub> substrate in the pristine state, which is due to charge impurities. Similar transport measurement was done for SL, BL and ML-WS<sub>2</sub> devices after 30 min DUV+N<sub>2</sub> exposure as shown in Figure S1b, d and f, where the back gate voltage was swept continuously from -80 to +40 V and then from +40 V to -80 V. Almost no (very small) hysteresis in threshold voltage ( $V_{th}$ ) was observed SL, BL and ML-WS<sub>2</sub> devices after DUV+N<sub>2</sub> treatment. The very weak hysteresis curves indicate that the number of charge impurities were reduced after DUV+N<sub>2</sub> exposure.

We have measured the transfer characteristics ( $I_{ds}$ - $V_{bg}$ ) of ML-WS<sub>2</sub> (32 nm thick) to confirm the similar effect as reported in the paper on MoS<sub>2</sub> films,<sup>1</sup> in which authors claimed that the mobility starts to decrease after a certain flake thickness. In our experiments a decrease of mobility and on/off ratio was observed for the 32-nm-thick ML-WS<sub>2</sub> device as compared to the 3.55-nm-thick ML-WS<sub>2</sub> device in our manuscript. Figure S2a shows the optical image of device used in our study. Figure S2b shows the transfer characteristics ( $I_{ds}$ - $V_{bg}$ ) of the 32-nm-thick ML-WS<sub>2</sub> device. The mobility of device was observed as 23 cm<sup>2</sup>/Vs and the on/off ratio as  $\sim 10^3$ , which were much lower than the mobility of 90 cm<sup>2</sup>/Vs and the on/off ratio of  $\sim 10^5$  of the 3.55-nm-thick WS<sub>2</sub> device.

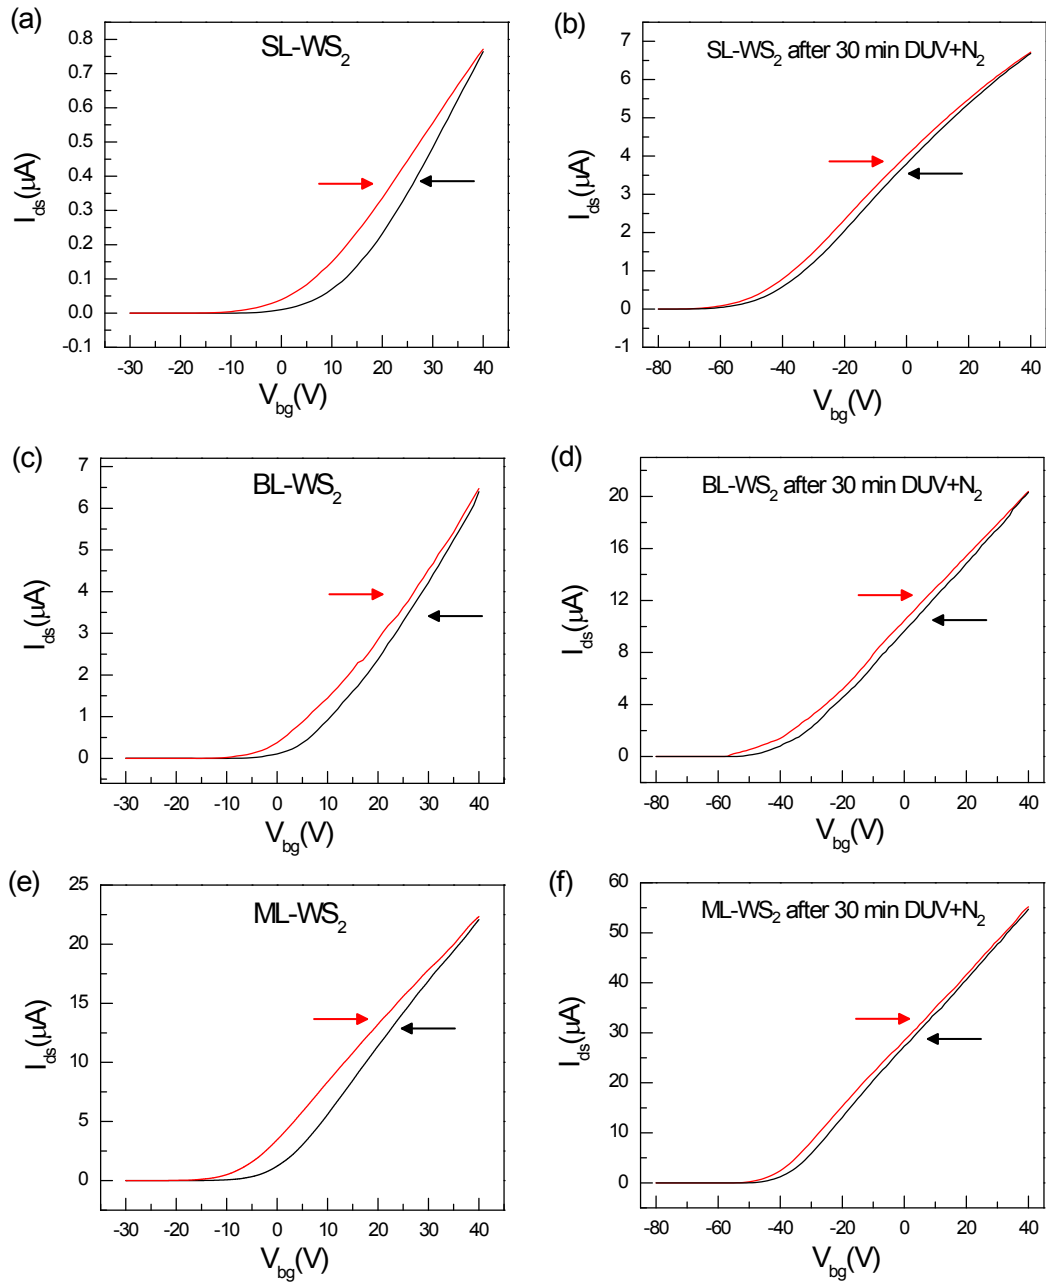

**Figure S1.** (a) Transfer characteristics ( $I_{ds}$ - $V_{bg}$ ) of the SL-WS<sub>2</sub> FET on SiO<sub>2</sub> substrate before DUV+N<sub>2</sub> exposure, where the back gate voltage was swept continuously from -30 to +40 V and then from +40 V to -30 V. (b) Transfer characteristics ( $I_{ds}$ - $V_{bg}$ ) of the SL-WS<sub>2</sub> FET on SiO<sub>2</sub> substrate after 30 min DUV+N<sub>2</sub> exposure, where the back gate voltage was swept continuously from -80 to +40 V and then from +40 V to -80 V. (c) Transfer characteristics of the BL-WS<sub>2</sub> FET on SiO<sub>2</sub> substrate before DUV+N<sub>2</sub> exposure. (d) Transfer characteristics of the BL-WS<sub>2</sub> FET on SiO<sub>2</sub> substrate after 30 min DUV+N<sub>2</sub> exposure. (e) Transfer characteristics of the ML-

WS<sub>2</sub> FET on SiO<sub>2</sub> substrate before DUV+N<sub>2</sub> exposure. (f) Transfer characteristics of the ML-WS<sub>2</sub> FET on SiO<sub>2</sub> substrate after 30 min DUV+N<sub>2</sub> exposure. All the measurements were performed in vacuum at room temperature.

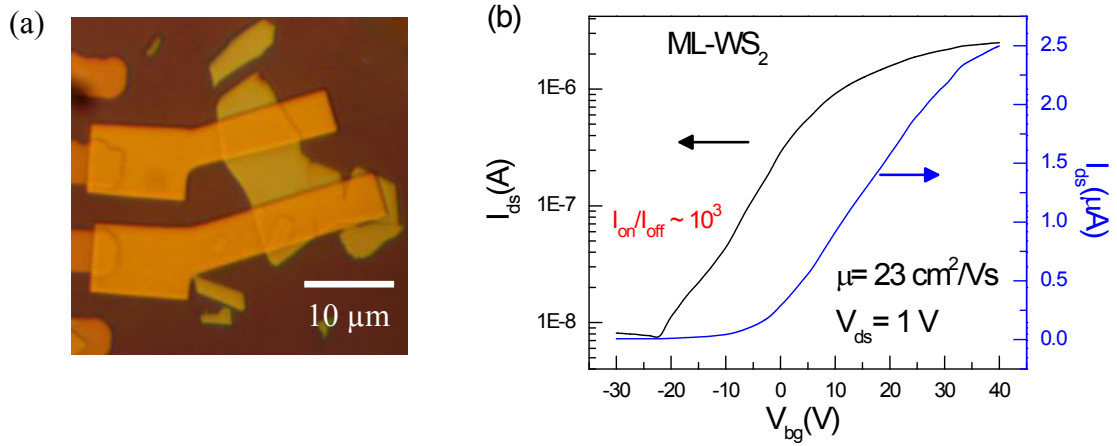

**Figure S2.** (a) Optical image of the 32-nm-thick ML-WS<sub>2</sub> FET. (b) Transfer characteristics ( $I_{ds}$ - $V_{bg}$ ) of the 32-nm-thick ML-WS<sub>2</sub> FET. The mobility of device was observed as 23 cm<sup>2</sup>/Vs and the on/off ratio as  $\sim 10^3$ .

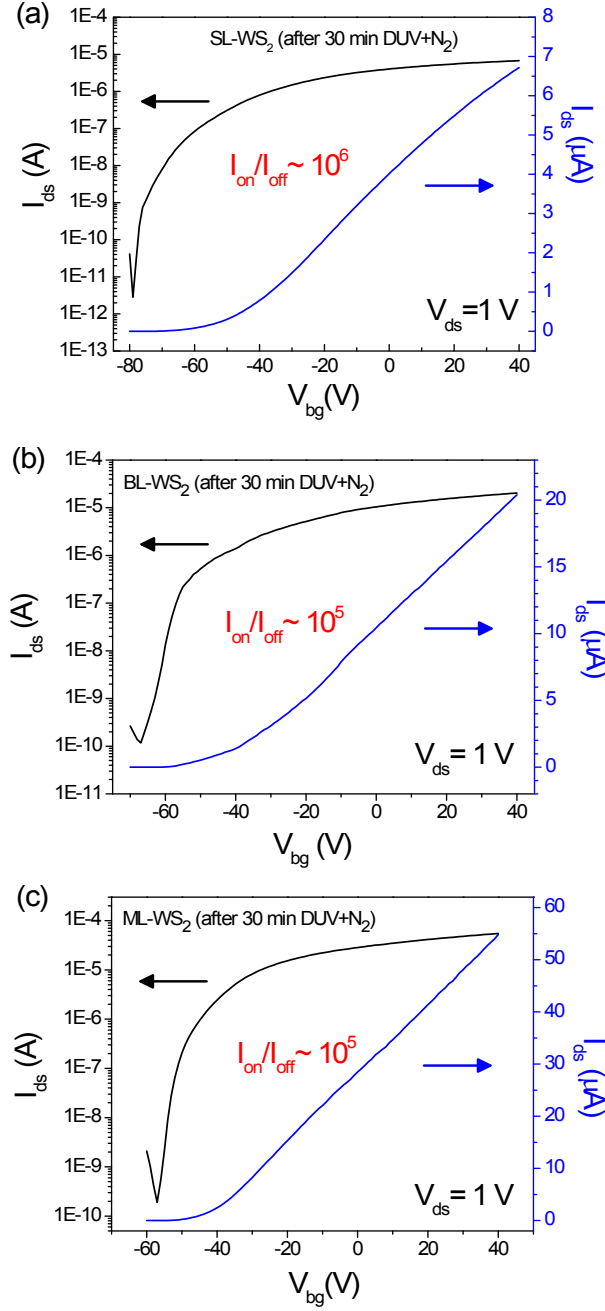

**Figure S3.** (a) Transfer characteristics ( $I_{ds}$ - $V_{bg}$ ) of SL-WS<sub>2</sub> FET after the 30 min DUV+N<sub>2</sub> treatment. On/Off ratio of the device is  $\sim 10^6$ . (b) Transfer characteristics ( $I_{ds}$ - $V_{bg}$ ) of BL-WS<sub>2</sub> FET after the 30 min DUV+N<sub>2</sub> treatment. On/Off ratio of the device is  $\sim 10^5$ . (c) Transfer characteristics ( $I_{ds}$ - $V_{bg}$ ) of ML-WS<sub>2</sub> FET after the 30 min DUV+N<sub>2</sub> treatment. On/Off ratio of the device is  $\sim 10^5$ . All measurements were performed in vacuum at  $T = 300$  K.

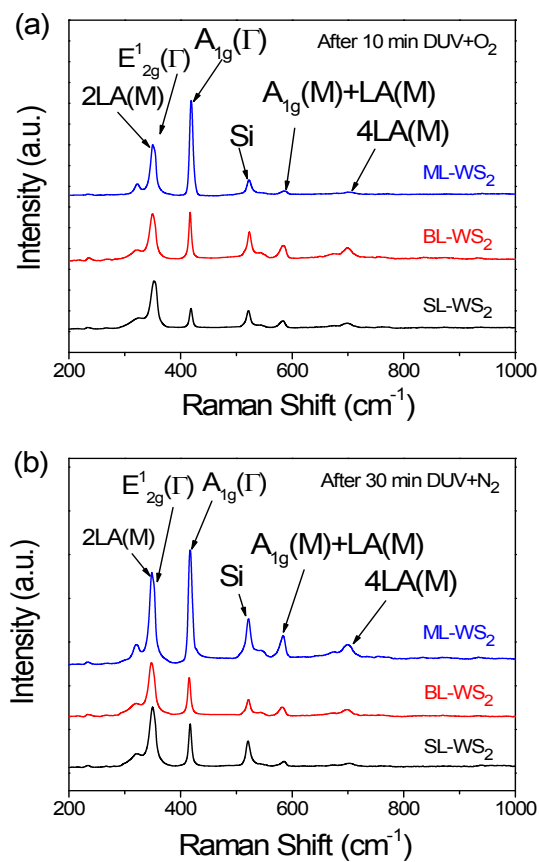

**Figure S4.** (a) Raman spectra for SL-WS<sub>2</sub>, BL-WS<sub>2</sub>, and ML-WS<sub>2</sub> films after the 10 min DUV+O<sub>2</sub> treatment. (b) Raman spectra for SL-WS<sub>2</sub>, BL-WS<sub>2</sub>, and ML-WS<sub>2</sub> films after the 30 min DUV+N<sub>2</sub> treatment. These Raman spectra reveal that additional ionic chemical bonds are not created in WS<sub>2</sub> films during DUV+O<sub>2</sub> and DUV+N<sub>2</sub> treatments.

**Table S1.** Oxygen amount detected through energy-dispersive X-ray spectroscopy for SL-WS<sub>2</sub>, BL-WS<sub>2</sub>, and ML-WS<sub>2</sub> before and after the 30 min DUV+N<sub>2</sub> treatment.

| Device             | Device No. | Before DUV+N <sub>2</sub> treatment | After DUV+N <sub>2</sub> treatment |
|--------------------|------------|-------------------------------------|------------------------------------|
| SL-WS <sub>2</sub> | 1          | 24.60±0.011%                        | 22.30±0.013%                       |
|                    | 2          | 24.65±0.014%                        | 22.37±0.015%                       |
| BL-WS <sub>2</sub> | 1          | 24.42±0.015%                        | 22.32±0.013%                       |
|                    | 2          | 24.35±0.011%                        | 22.23±0.012%                       |
| ML-WS <sub>2</sub> | 1          | 24.50±0.015%                        | 22.60±0.012%                       |
|                    | 2          | 24.55±0.013%                        | 22.63±0.014%                       |

## References

1. S. Das and J. Appenzeller, *physica status solidi (RRL)-Rapid Research Letters*, 2013, **7**, 268-273.
